# Supplementary material for: Mapping mechanical properties of biological materials via an add-on Brillouin module to confocal microscopes
Source: Springer Nature journal article supplement (doi:10.1038/s41596-020-00457-2), 2021-01-15
Supplement: MOESM1 [file 41596_2020_457_MOESM1_ESM22.pdf]

---

**Supplementary information**

---

**Mapping mechanical properties of biological materials via an add-on Brillouin module to confocal microscopes**

---

In the format provided by the  
authors and unedited

# **Mapping mechanical properties of biological materials via an add-on Brillouin module to confocal microscopes**

Jitao Zhang and Giuliano Scarcelli

Fischell Department of Bioengineering, University of Maryland, College Park, MD, 20742, USA

Correspondence can be addressed to: Jitao Zhang (jtzhang4@umd.edu) or Giuliano Scarcelli (scarc@umd.edu)

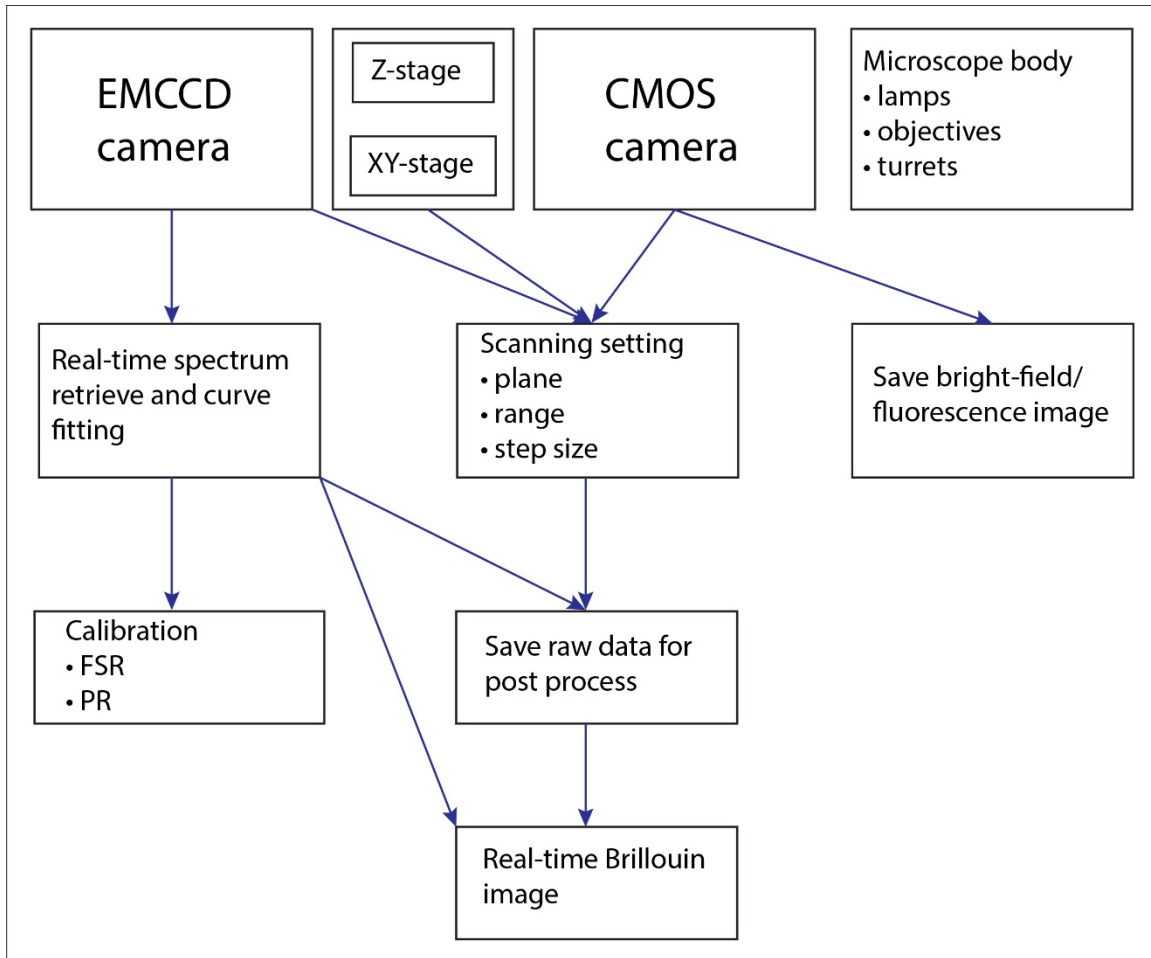

**Supplementary Figure 1:** Block diagram of the LabVIEW program developed for data acquisition.

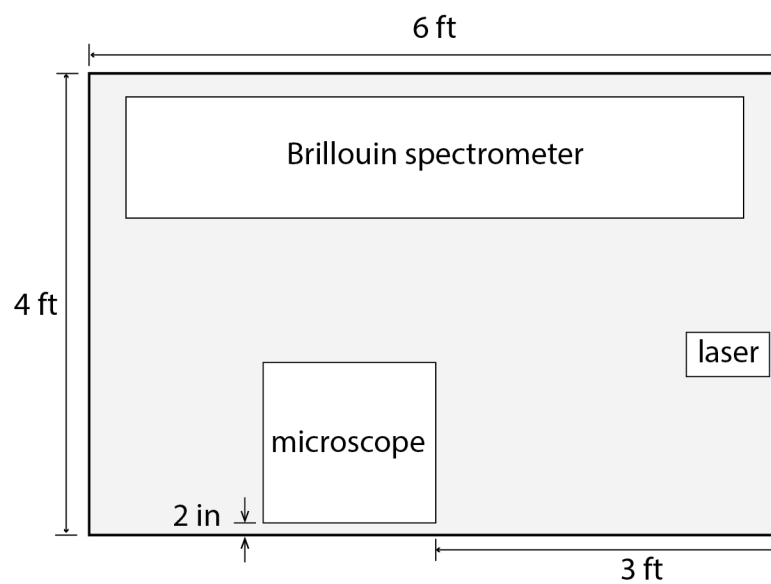

**Supplementary Figure 2:** Layout of the optical table. The drawing is for demonstration purpose and not necessarily to scale.

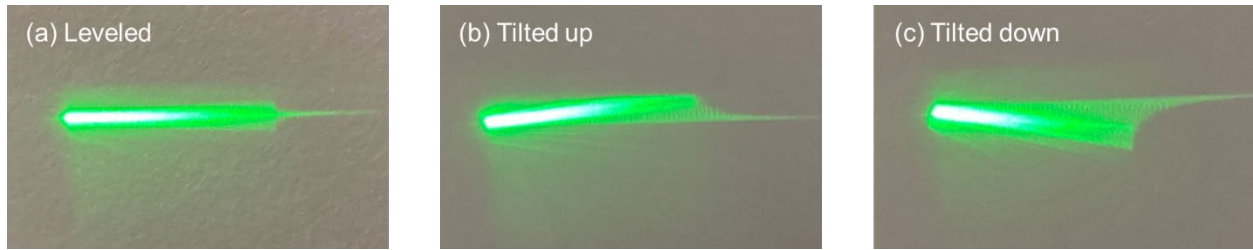

**Supplementary Figure 3:** Examples of the optical pattern collected right after the VIPA2 corresponding to the adjustment of vertical-tilt degree of freedom. (a) pattern is leveled horizontally with proper adjustment. (b) & (c): pattern is tilted with improper adjustment. Note: the laser used for collecting these patterns is different from the one used in the protocol.

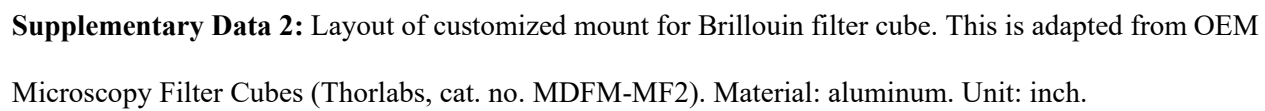

Microscopy Filter Cubes (Thorlabs, cat. no. MDFM-MF2). Material: aluminum. Unit: inch.

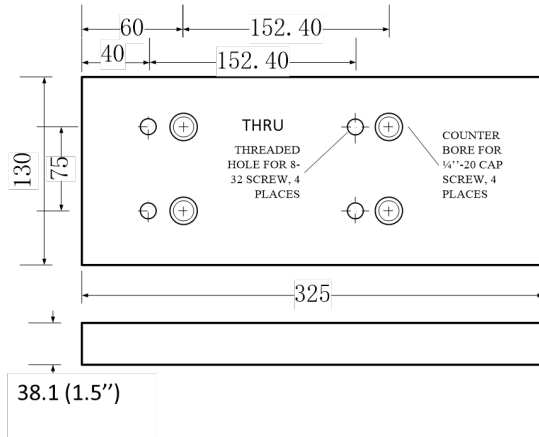

(A) Bottom plate

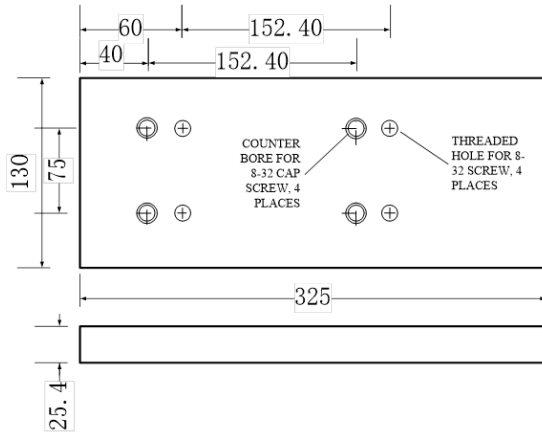

(B) Intermediate plate

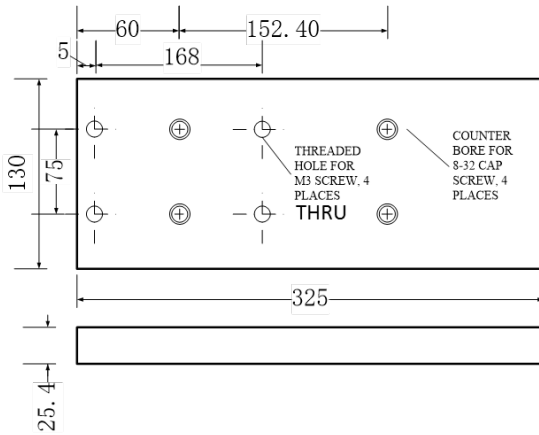

(C) Top plate

**Supplementary Data 3:** Layout of customized mounting base for laser head. The overall height of the base stacks should be adjusted based on the height of the microscope port. Material: aluminum. Unit: mm.

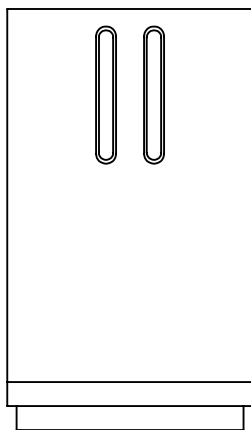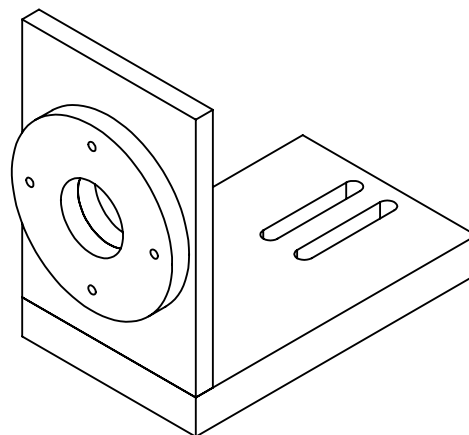

Assembly  
 - includes  
   base component  
   front component  
   circle component  
   spacer

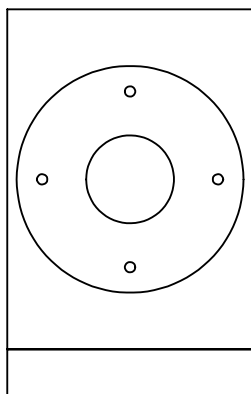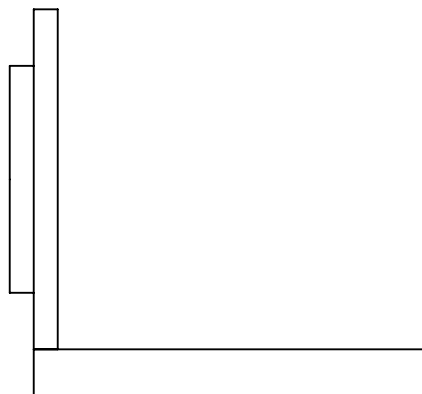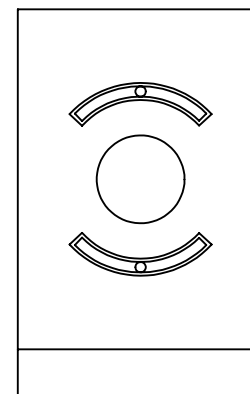

**Supplementary Data 4:** Mounting stand for EMCCD camera. Part A: overview.



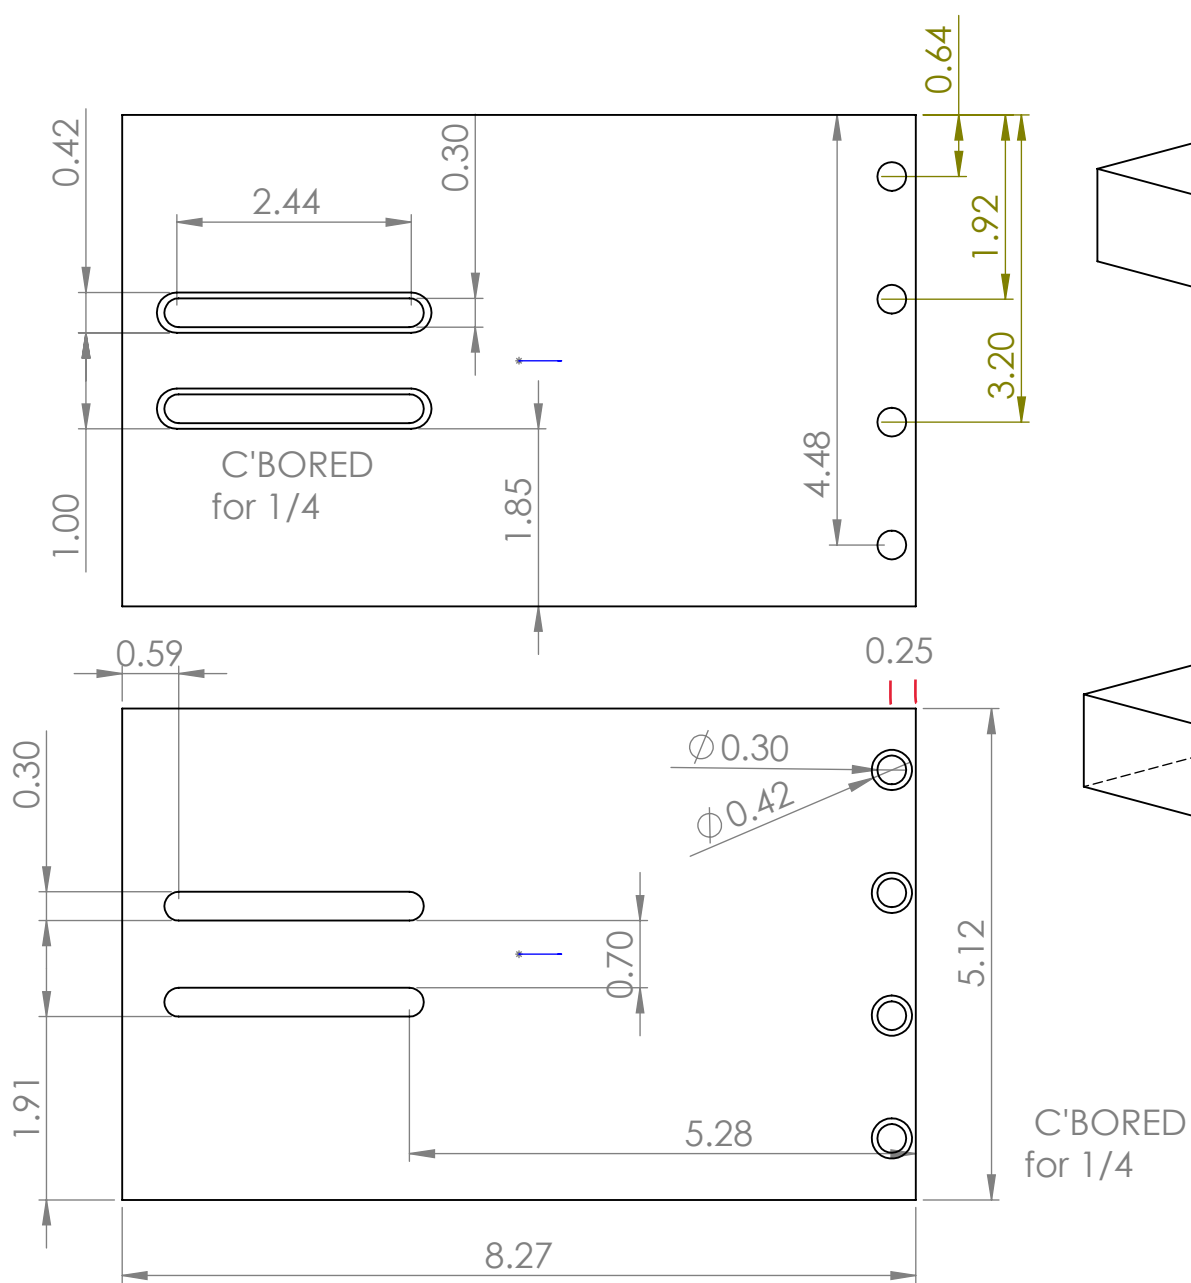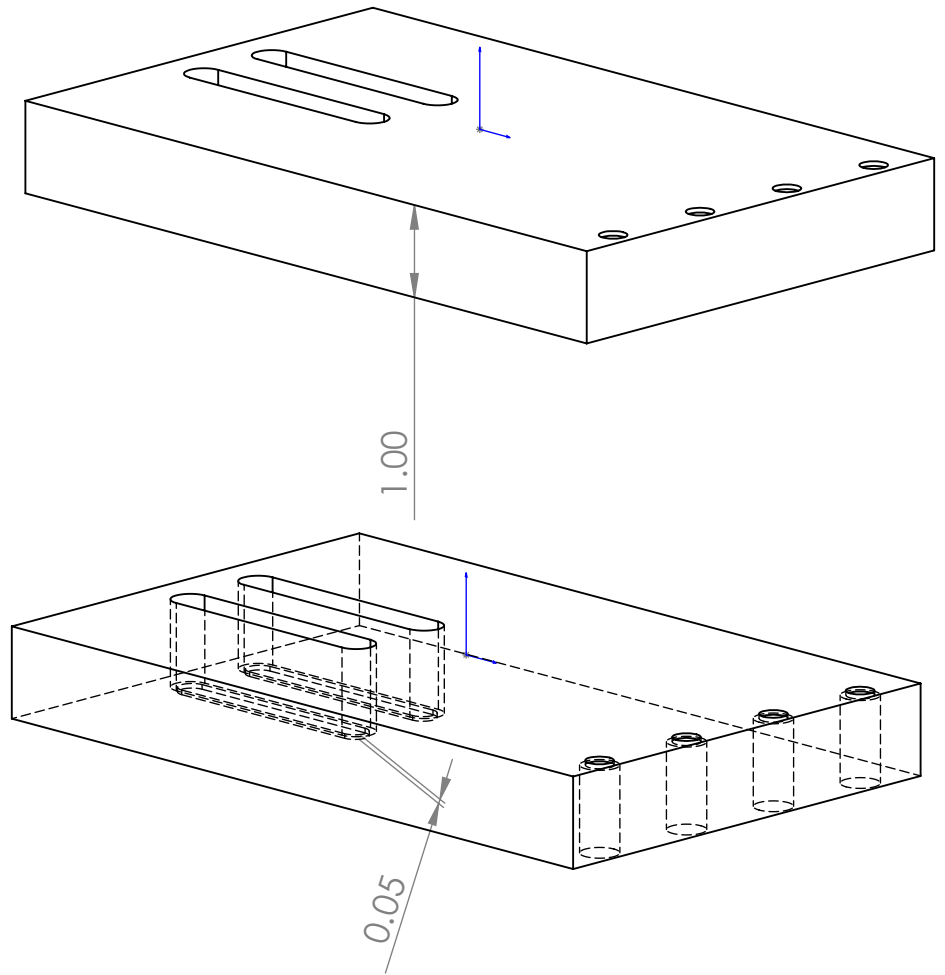

#### Base Component (aluminum)

-units in inches

-sliding holes 1in apart, made for 1/4 20 cap screws to be completely screwed but hidden

-  
-4 holes made for 1/4 20 cap screws to be screwed but hidden in opposite direction to attach to front piece

**Supplementary Data 4:** Mounting stand for EMCCD camera. Part B: base component.

### Circle Component (aluminum)

-sketch units in inches

-circle 2.36in radius, holes along vertical axis have 0.30in diameter and 1.831in from origin for m5 cap screws to line up with arcs from rectangular component

-holes along horizontal axis have same inner circle dimensions as vertical circles but allow screws to be hidden solely for extra support, 0.42in diameter

-1.831in diameter hole through center of piece for light to enter camera lens

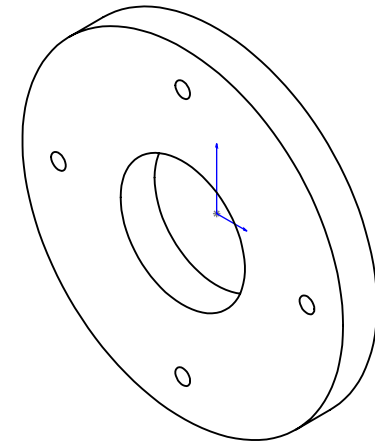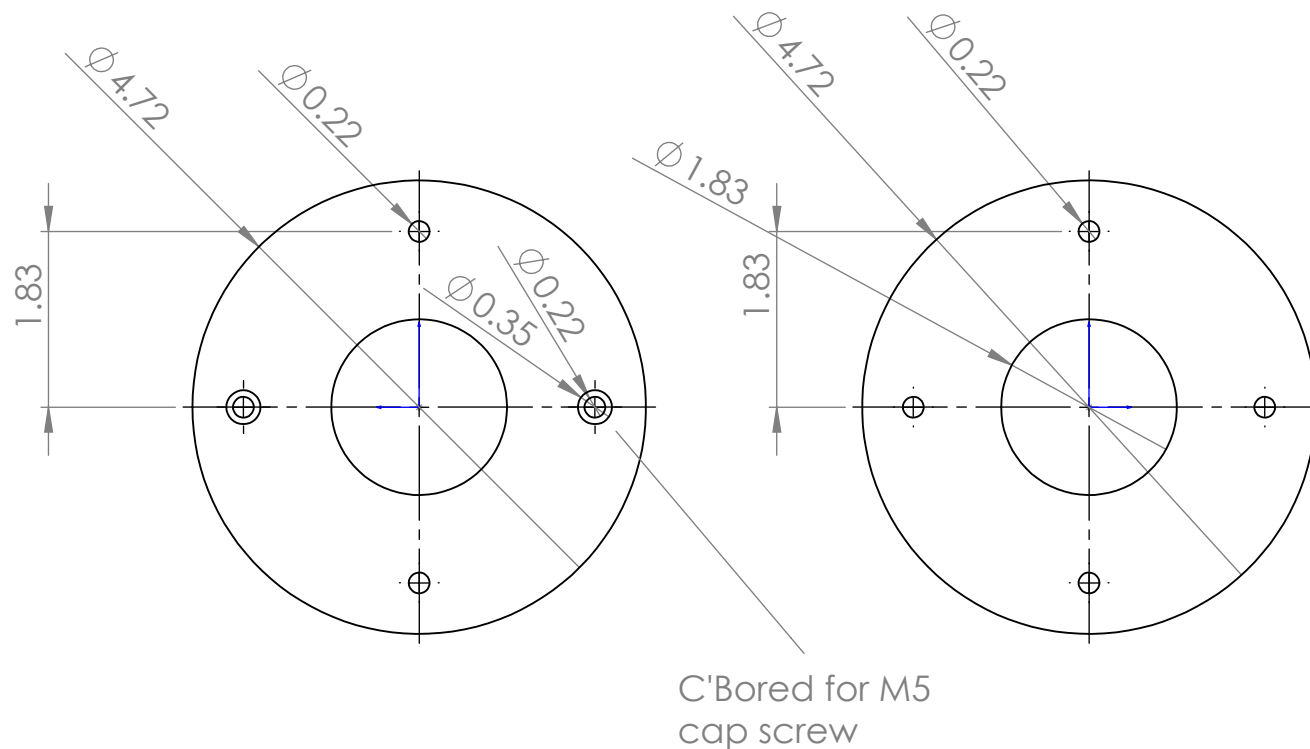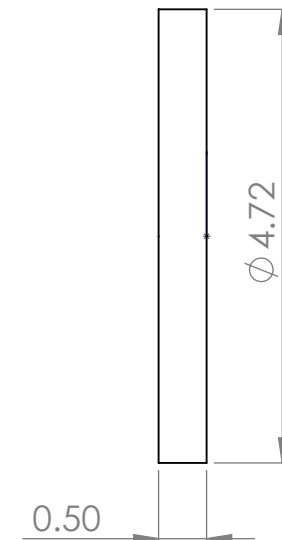

**Supplementary Data 4:** Mounting stand for EMCCD camera. Part C: circle component.

Front component (aluminum)

- units in inches
- holes in bottom threaded 1in deep for 1/4 20 cap screws,
- circle arcs allow for m5 cap screws to be hidden within the piece and rotate +/- 45 degrees
- circle arcs located at center of rectangle
- centers of screws of interest located 1.831in above and below center point
- 1.831in diameter hole through center of piece for light to enter camera lens

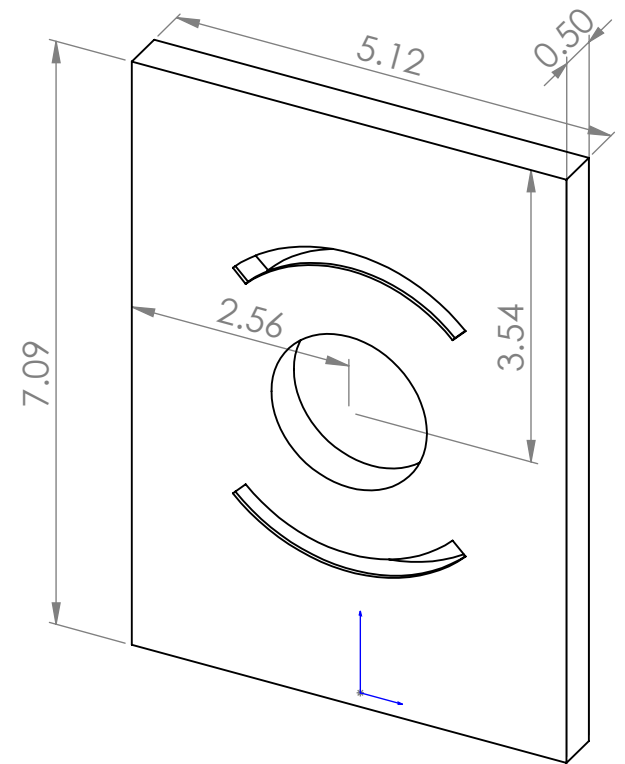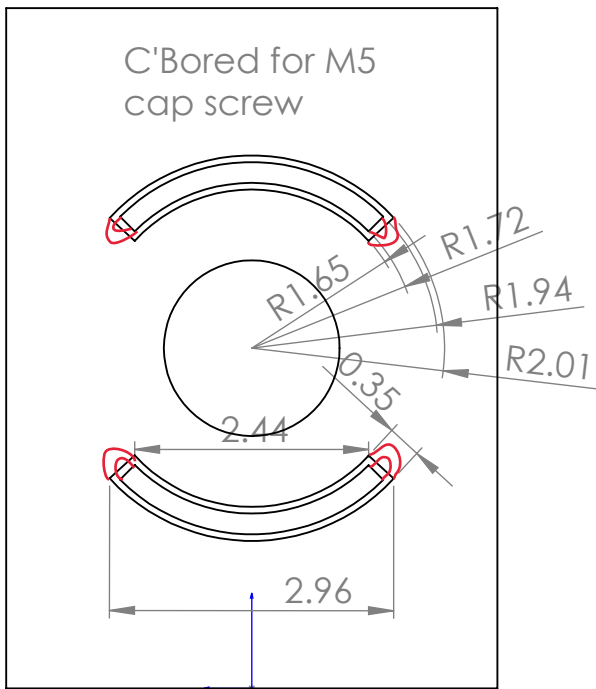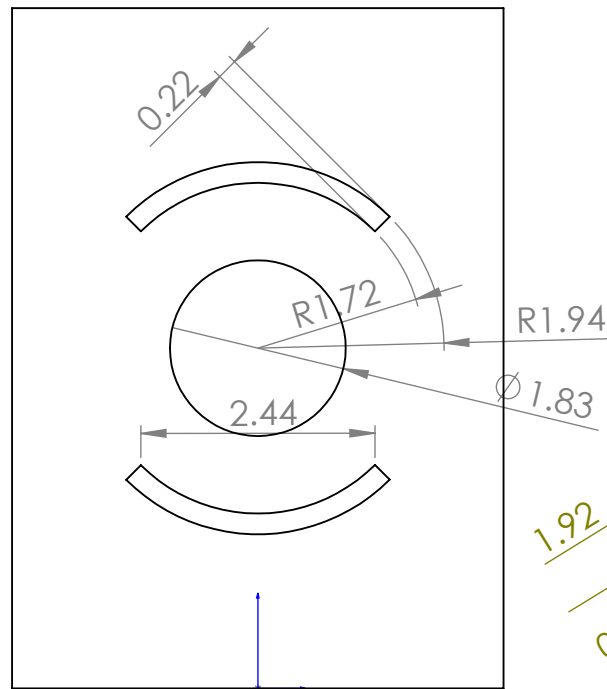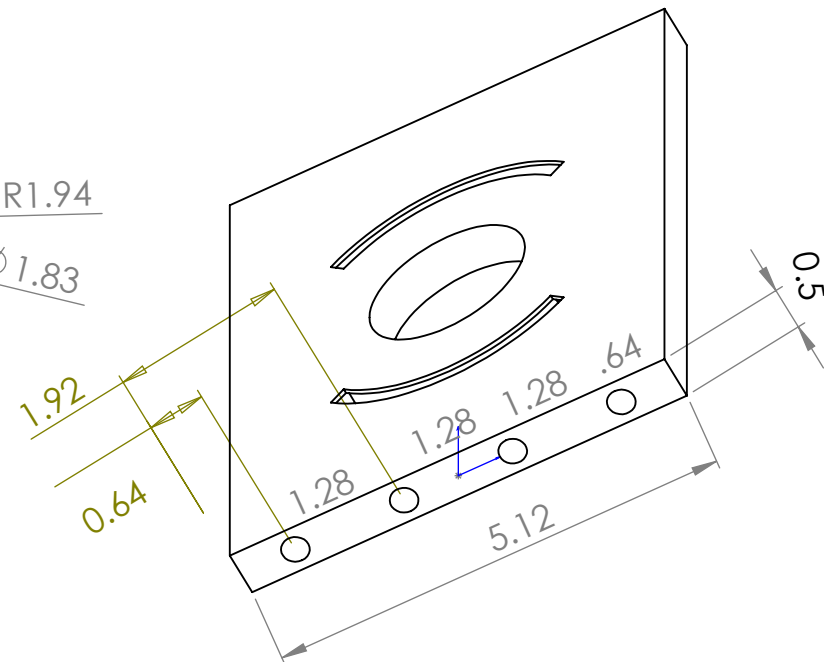

**Supplementary Data 4:** Mounting stand for EMCCD camera. Part D: front component.

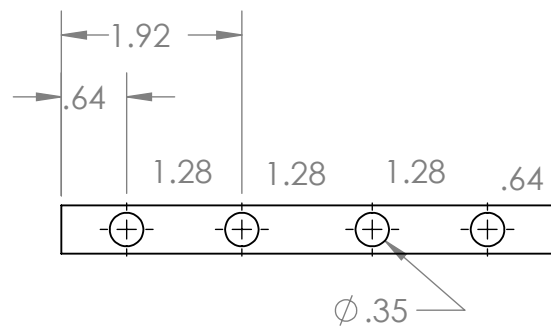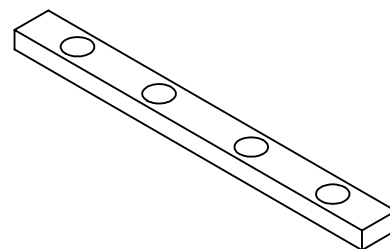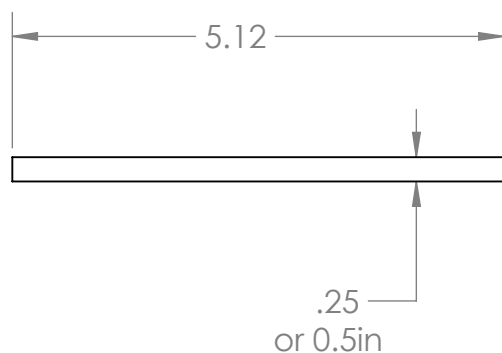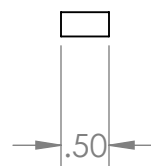

### **Spacers**

-2 1/4 in. thick spacers with 0.35in diameter through holes for use in raising height of front component  
 -2 1/2in. thick spacers with same geometry

**Supplementary Data 4:** Mounting stand for EMCCD camera. Part E: spacers.
